# Supplementary material for: Aqueous binder effects of poly(acrylic acid) and carboxy methylated cellulose on anode performance in lithium-ion batteries
Source: Royal Society of Chemistry journal article supplement (doi:10.1039/c9nj02078k), 2019-01-01
Supplement: c9nj02078k1.pdf [file c9nj02078k1.pdf]

**Supporting Information for**

**Aqueous Binder Effects of Poly(acrylic acid) and Carboxy Methylated Cellulose on Anode Performance in Lithium-Ion Battery**

Xiaofei Yang,<sup>d</sup> Huimin Zhang,<sup>b</sup> Hai Ming,<sup>\*,a,e</sup> Jingyi Qiu,<sup>a</sup> Gaoping Cao,<sup>a</sup> Meng Li,<sup>a</sup> Xiayu Zhu,<sup>a</sup> Chen Sui,<sup>f</sup> Tingting Zhang<sup>d,\*</sup>, and Jun Ming<sup>\*,c</sup>

<sup>a</sup>Research Institute of Chemical Defence, Beijing key Laboratory of Advanced Chemical Energy Storage Technology and Materials, Beijing 100191, China; lunaticmh@163.com.

<sup>b</sup>Beijing Institute of Technology, Beijing 100081, China.

<sup>c</sup>State Key Laboratory of Electroanalytical Chemistry, Changchun Institute of Applied Chemistry, Chinese Academy of Sciences, Changchun 215123, P. R. China; jun.ming@ciac.ac.cn.

<sup>d</sup>College of Chemical Engineering, Beijing University of Chemical Technology; zhangtt@mail.buct.edu.cn.

<sup>e</sup>State Key Laboratory for Manufacturing Systems Engineering, Xi'an Jiaotong University.

<sup>f</sup>Beijing seven star flight electronic company.

Electronic Supplementary Information (ESI) available: [details of any supplementary information available should be included here]. See DOI: 10.1039/x0xx00000x

**Table S1** equivalent circuit analysis

|                                            | <b>PAA</b> |                 | <b>CMC</b> |                 | <b>PAA/CMC</b> |                 |
|--------------------------------------------|------------|-----------------|------------|-----------------|----------------|-----------------|
|                                            | OCV        | 7 <sup>th</sup> | OCV        | 7 <sup>th</sup> | OCV            | 7 <sup>th</sup> |
| ESR <sup>a</sup> ( $\Omega$ )              | 1.81       | 2.27            | 1.78       | 2.01            | 1.907          | 2.031           |
| R <sub>ct</sub> <sup>b</sup> ( $\Omega$ )  | 44.81      | 56.25           | 66.95      | 15.42           | 183.7          | 14.27           |
| Z <sub>W-R</sub> <sup>c</sup> ( $\Omega$ ) | 10.11      | 92.73           | 50.69      | 130.0           | 138.6          | 12.22           |

<sup>a</sup>ESR: equivalent series resistance.

<sup>b</sup>R<sub>ct</sub>: charge-transfer resistance.

<sup>c</sup>Z<sub>W-R</sub>: Warburg resistance.
